# Supplementary material for: Fungal Signature in the Gut Microbiota of Pediatric Patients With Inflammatory Bowel Disease
Source: Oxford University Press journal article supplement (doi:10.1097/mib.0000000000000454), 2015-06-17
Supplement: ibd_2015_03_31_wu_15-0131_sdc1.pdf [file ibd_2015_03_31_wu_15-0131_sdc1.pdf]

Supplemental Table 1. Pediatric IBD subjects studied.

| Subject       | Age | Sex | Disease activity# | Medications <sup>^</sup> | Upper disease | Ileal disease | Cecal disease | Colon disease | Rectum disease | History of perianal disease (ever) | Stricturing disease | History of Antibiotics treatment for IBD (ever) | Current abx use | Steroid use | Mesalamine use | Thiopurine use | Methotrexate use |
|---------------|-----|-----|-------------------|--------------------------|---------------|---------------|---------------|---------------|----------------|------------------------------------|---------------------|-------------------------------------------------|-----------------|-------------|----------------|----------------|------------------|
| Subject001_CD | 13  | M   | 1                 | 3                        | No            | Yes           | Yes           | Yes           | No             | No                                 | No                  | Yes                                             | No              | No          | Yes            | No             | Yes              |
| Subject004_CD | 18  | F   | *                 | 1                        | Yes           | Yes           | No            | Yes           | No             | No                                 | No                  | Yes                                             | No              | Yes         | Yes            | No             | Yes              |
| Subject006_CD | 18  | M   | 1                 | 2                        | Yes           | No            | No            | Yes           | No             | No                                 | No                  | No                                              | No              | Yes         | Yes            | No             | Yes              |
| Subject009_CD | 16  | F   | 2                 | 1, 4                     | No            | Yes           | No            | Yes           | No             | Yes                                | No                  | Yes                                             | No              | No          | Yes            | Yes            | Yes              |
| Subject011_CD | 9   | F   | 1                 | 3                        | Yes           | Yes           | No            | Yes           | No             | No                                 | No                  | Yes                                             | No              | Yes         | Yes            | No             | No               |
| Subject013_CD | 18  | F   | 1                 | 1, 4                     | No            | Yes           | No            | Yes           | Yes            | Yes                                | No                  | Yes                                             | No              | Yes         | Yes            | Yes            | Yes              |
| Subject014_CD | 15  | M   | 1                 | 1, 3, 5                  | Yes           | Yes           | No            | Yes           | No             | No                                 | No                  | Yes                                             | No              | Yes         | Yes            | Yes            | Yes              |
| Subject015_UC | 10  | F   | 1                 | 1                        | No            | No            | No            | Yes           | Yes            | No                                 | No                  | Yes                                             | No              | Yes         | Yes            | No             | No               |
| Subject016_CD | 14  | M   | 1                 | 1                        | Yes           | Yes           | No            | Yes           | No             | No                                 | No                  | No                                              | No              | No          | Yes            | No             | No               |
| Subject019_CD | 12  | F   | 2                 | 1, 2                     | No            | Yes           | No            | Yes           | No             | No                                 | No                  | Yes                                             | No              | Yes         | Yes            | No             | Yes              |
| Subject022_CD | 13  | F   | 1                 | 1, 3                     | Yes           | Yes           | No            | Yes           | No             | No                                 | No                  | No                                              | No              | Yes         | Yes            | No             | No               |
| Subject023_UC | 14  | M   | 1                 | 1                        | No            | No            | No            | Yes           | No             | No                                 | No                  | Yes                                             | No              | Yes         | Yes            | No             | No               |
| Subject026_CD | 9   | M   | 1                 | 1, 2                     | No            | Yes           | No            | Yes           | Yes            | Yes                                | No                  | Yes                                             | No              | Yes         | Yes            | Yes            | No               |
| Subject033_CD | 13  | F   | 1                 | 3                        | Yes           | Yes           | No            | Yes           | Yes            | No                                 | No                  | No                                              | No              | Yes         | Yes            | Yes            | Yes              |
| Subject034_CD | 4   | F   | 1                 | 1                        | Yes           | Yes           | No            | Yes           | No             | No                                 | No                  | No                                              | No              | No          | Yes            | No             | No               |
| Subject035_CD | 18  | M   | 1                 | 3                        | No            | Yes           | Yes           | No            | No             | No                                 | No                  | Yes                                             | No              | Yes         | Yes            | No             | No               |
| Subject036_CD | 16  | F   | 1                 | 1, 4                     | No            | Yes           | No            | Yes           | No             | Yes                                | No                  | Yes                                             | No              | Yes         | Yes            | Yes            | Yes              |
| Subject037_CD | 16  | M   | 1                 | 1, 2                     | Yes           | Yes           | No            | Yes           | No             | No                                 | No                  | No                                              | No              | Yes         | Yes            | Yes            | No               |
| Subject039_CD | 17  | F   | 1                 | 1, 3                     | No            | No            | No            | Yes           | Yes            | Yes                                | No                  | Yes                                             | No              | Yes         | Yes            | Yes            | No               |
| Subject041_CD | 12  | M   | 2                 | 3                        | No            | No            | Yes           | No            | No             | Yes                                | No                  | No                                              | No              | Yes         | Yes            | No             | No               |
| Subject042_CD | 15  | M   | 2                 | 1, 3                     | Yes           | Yes           | No            | Yes           | No             | Yes                                | No                  | Yes                                             | No              | Yes         | Yes            | Yes            | No               |
| Subject043_IC | 6   | M   | 2                 | 1                        | No            | No            | No            | Yes           | No             | No                                 | No                  | Yes                                             | No              | Yes         | Yes            | Yes            | Yes              |
| Subject045_CD | 11  | F   | 1                 | 1, 2                     | Yes           | Yes           | No            | Yes           | No             | No                                 | No                  | No                                              | No              | Yes         | No             | No             | Yes              |
| Subject046_CD | 11  | F   | 1                 | 1                        | Yes           | Yes           | No            | Yes           | No             | No                                 | No                  | No                                              | No              | No          | Yes            | No             | No               |
| Subject047_CD | 14  | F   | 2                 | 3                        | Yes           | Yes           | No            | No            | No             | No                                 | Yes                 | No                                              | No              | Yes         | No             | No             | No               |
| Subject049_UC | 20  | M   | 1                 | 4                        | No            | No            | No            | Yes           | No             | No                                 | No                  | Yes                                             | No              | Yes         | Yes            | No             | Yes              |
| Subject051_CD | 12  | F   | 1                 | 3                        | No            | Yes           | Yes           | Yes           | No             | No                                 | No                  | Yes                                             | No              | Yes         | Yes            | No             | No               |
| Subject052_CD | 15  | M   | 1                 | 1, 3                     | Yes           | Yes           | No            | Yes           | No             | Yes                                | No                  | No                                              | No              | Yes         | Yes            | No             | No               |
| Subject053_CD | 17  | M   | 1                 | 1, 3                     | Yes           | Yes           | Yes           | Yes           | No             | No                                 | Yes                 | No                                              | No              | Yes         | Yes            | Yes            | Yes              |
| Subject054_UC | 16  | M   | 1                 | 1, 4                     | No            | No            | No            | Yes           | No             | No                                 | No                  | Yes                                             | No              | Yes         | Yes            | Yes            | Yes              |
| Subject055_CD | 15  | M   | 1                 | 1, 3                     | No            | Yes           | No            | Yes           | No             | No                                 | Yes                 | Yes                                             | No              | Yes         | Yes            | Yes            | No               |
| Subject057_IC | 11  | M   | *                 | 1, 5                     | Yes           | No            | No            | Yes           | Yes            | No                                 | No                  | Yes                                             | No              | Yes         | Yes            | No             | No               |

\* = Incomplete data

# Quiescent (PCDAI<=10 or PUCAI <=10)=1, Active (PCDAI>10 or PUCAI>10)=2

<sup>^</sup>None, 5-ASA, other topical therapy (enemas, entocort) or enteral nutritional therapy = 1, immunomodulator = 2, biologic = 3, combination therapy = 4, corticosteroid = 5
