# Supplementary material for: Fungal Signature in the Gut Microbiota of Pediatric Patients With Inflammatory Bowel Disease
Source: Oxford University Press journal article supplement (doi:10.1097/mib.0000000000000454), 2015-06-17
Supplement: ibd_2015_03_31_wu_15-0131_sdc2.pdf [file ibd_2015_03_31_wu_15-0131_sdc2.pdf]

**Supplemental Table 2. Oligonucleotides primers used in this study.**

| <b>Primer</b>        | <b>Sequence</b>              |
|----------------------|------------------------------|
| <b>Archaea 16S</b>   |                              |
| 958aF                | 5'-AATTGGAKTCAACGCCKGR-3'    |
| 1378aR               | 5'-TGTGTGCAAGGAGCAGGGAC-3'   |
| <b>Bacterial 16S</b> |                              |
| 27F                  | 5-AGAGTTTGATCCTGGCTCAG-3     |
| 338R                 | 5-CTGCTGCCTYCCGTA-3          |
| <b>Fungal ITS</b>    |                              |
| ITS1F                | 5'-CTTGGTCATTTAGAGGAAGTAA-3' |
| ITS2R                | 5'-GCTGCGTTCTTCATCGATGC-3'   |
