# Supplementary material for: Fungal Signature in the Gut Microbiota of Pediatric Patients With Inflammatory Bowel Disease
Source: Oxford University Press journal article supplement (doi:10.1097/mib.0000000000000454), 2015-06-17

### Supplemental Figure 1 Heatmap of Genera Level Bacterial Abundances in Pediatric IBD subjects.

Proportion of 97% 16S bacterial OTUs in Crohn's Disease (CD), Indeterminate colitis (IC) and Ulcerative colitis (UC) IBD subjects. The color bar on the right side indicates the average relative abundances of these genera in each subject.

### Supplemental Figure 1

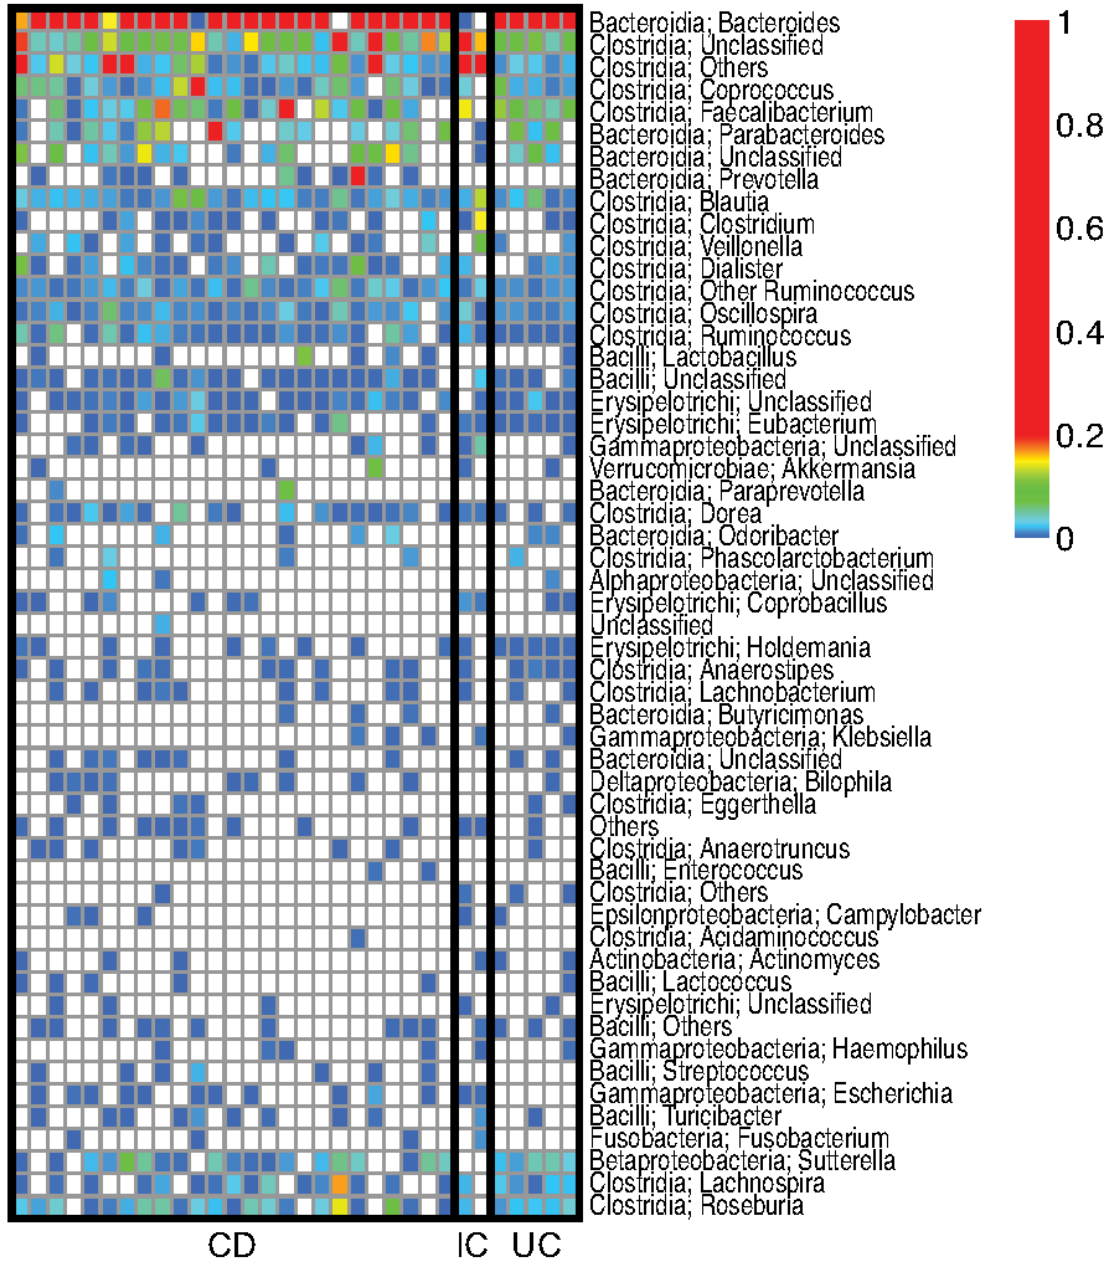

Supplement: ibd_2015_03_31_wu_15-0131_sdc4.pdf [file ibd_2015_03_31_wu_15-0131_sdc4.pdf]
