# Supplementary material for: Fungal Signature in the Gut Microbiota of Pediatric Patients With Inflammatory Bowel Disease
Source: Oxford University Press journal article supplement (doi:10.1097/mib.0000000000000454), 2015-06-17

**Supplemental Figure 2 Comparison of adult healthy, pediatric healthy and pediatric IBD subjects' bacterial community composition using principal coordinate ordination.**

Principal coordinate analysis is used to depict the relatedness of bacterial communities based on presence or absence. The axes represent the first two highest discriminating axes using the unweighted Unifrac distance metric.

**Supplemental Figure 2**

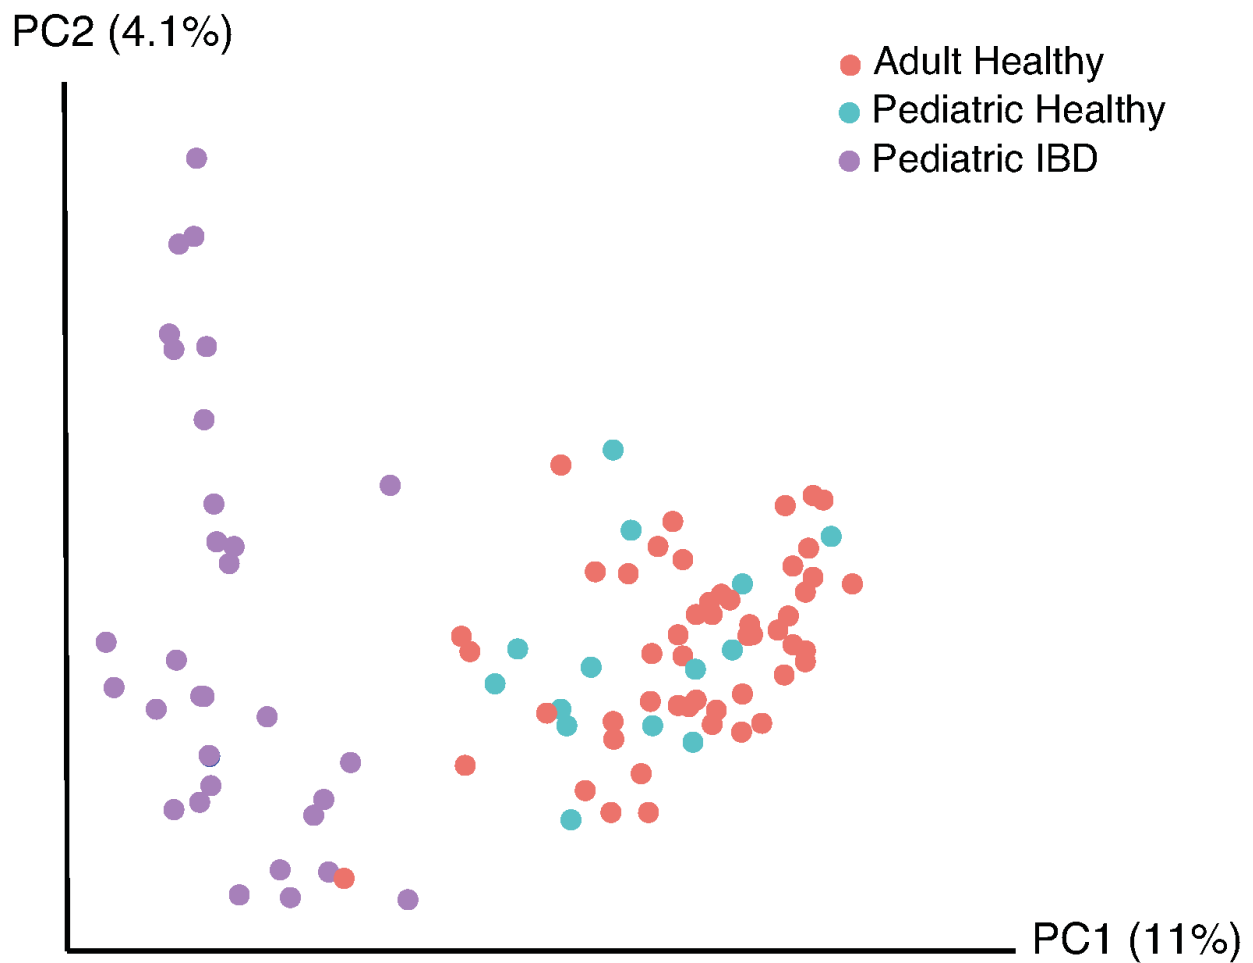

Supplement: ibd_2015_03_31_wu_15-0131_sdc5.pdf [file ibd_2015_03_31_wu_15-0131_sdc5.pdf]
