# Supplementary material for: Fungal Signature in the Gut Microbiota of Pediatric Patients With Inflammatory Bowel Disease
Source: Oxford University Press journal article supplement (doi:10.1097/mib.0000000000000454), 2015-06-17

**Supplemental Figure 3 Shannon Diversity Index for the bacterial communities is lower in IBD subjects compared to healthy subjects.**

The Shannon diversity index was calculated based on the 97% OTU-level classification tables. The diversity values for: (1) all healthy subjects, (2) only the adult healthy subjects, (3) only the pediatric healthy subjects, and (4) the pediatric IBD subjects are shown. Each black dot represents a different subject.

Supplemental Figure 3

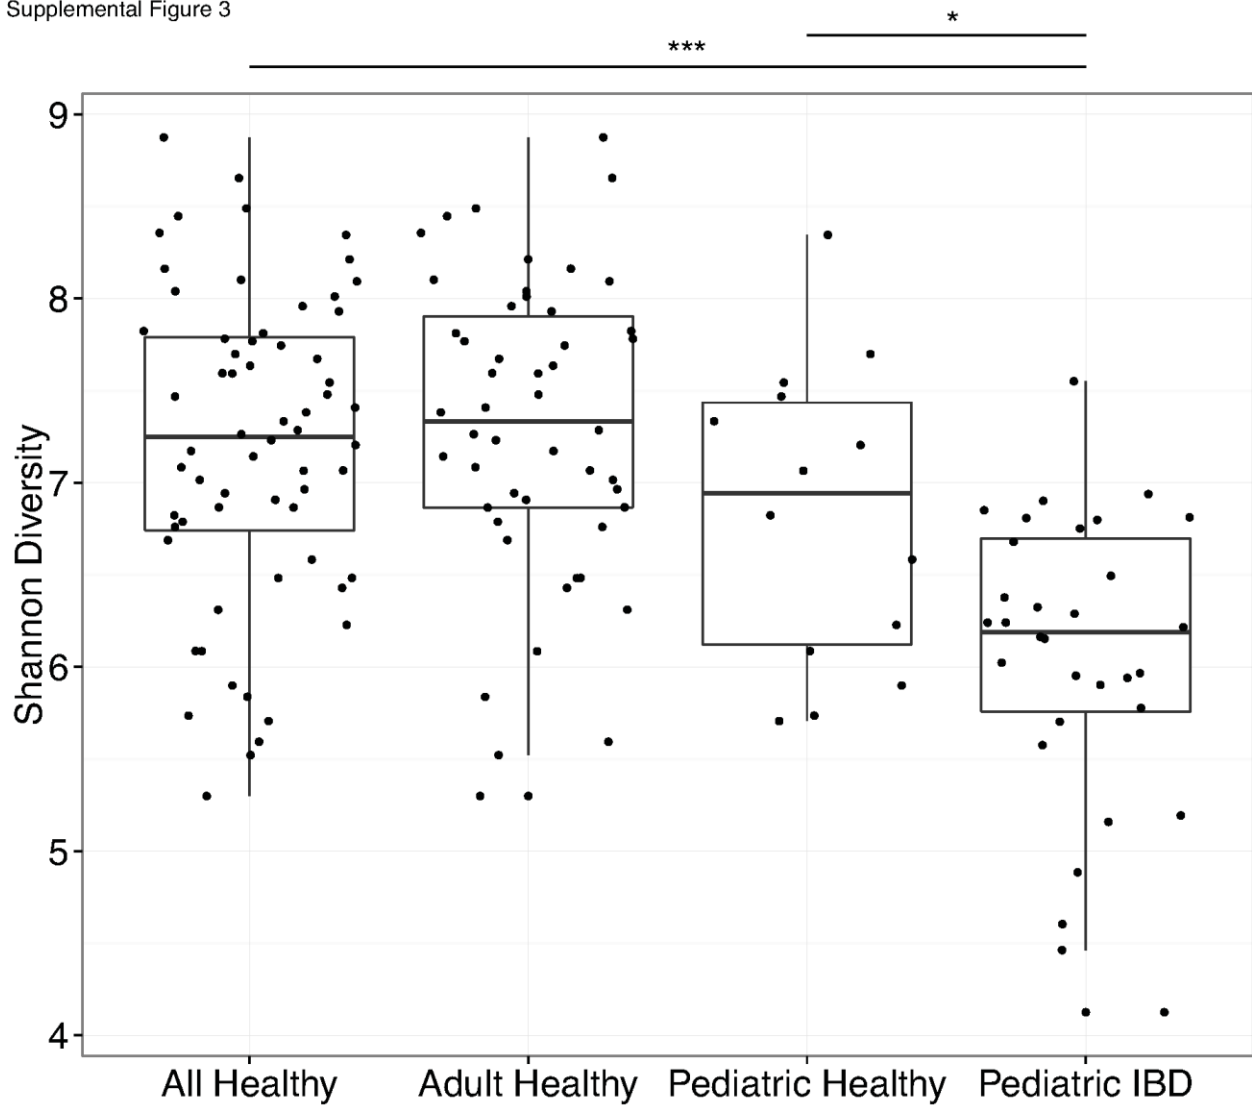

Supplement: ibd_2015_03_31_wu_15-0131_sdc6.pdf [file ibd_2015_03_31_wu_15-0131_sdc6.pdf]
