# Supplementary material for: Fungal Signature in the Gut Microbiota of Pediatric Patients With Inflammatory Bowel Disease
Source: Oxford University Press journal article supplement (doi:10.1097/mib.0000000000000454), 2015-06-17

**Supplemental Figure 4 Low number of Archaeal reads in IBD subjects.**

Archaeal reads were classified using reference Greengenes sequences. All reads were classified as Methanobrevibacter.

Supplemental Figure 4

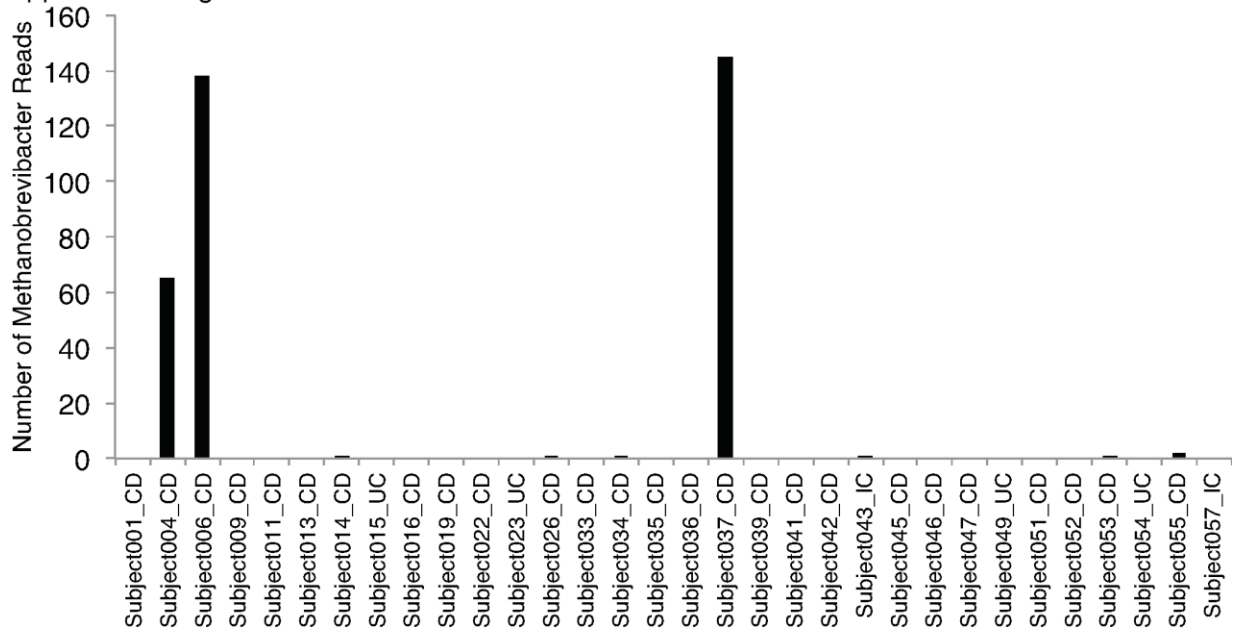

Supplement: ibd_2015_03_31_wu_15-0131_sdc7.pdf [file ibd_2015_03_31_wu_15-0131_sdc7.pdf]
