# Supplementary material for: Fungal Signature in the Gut Microbiota of Pediatric Patients With Inflammatory Bowel Disease
Source: Oxford University Press journal article supplement (doi:10.1097/mib.0000000000000454), 2015-06-17

**Supplemental Figure 5 Decreased number of Archaeal reads in IBD subjects compared to healthy subjects.** The number of archaeal reads per subject are plotted.

## Supplemental Figure 5

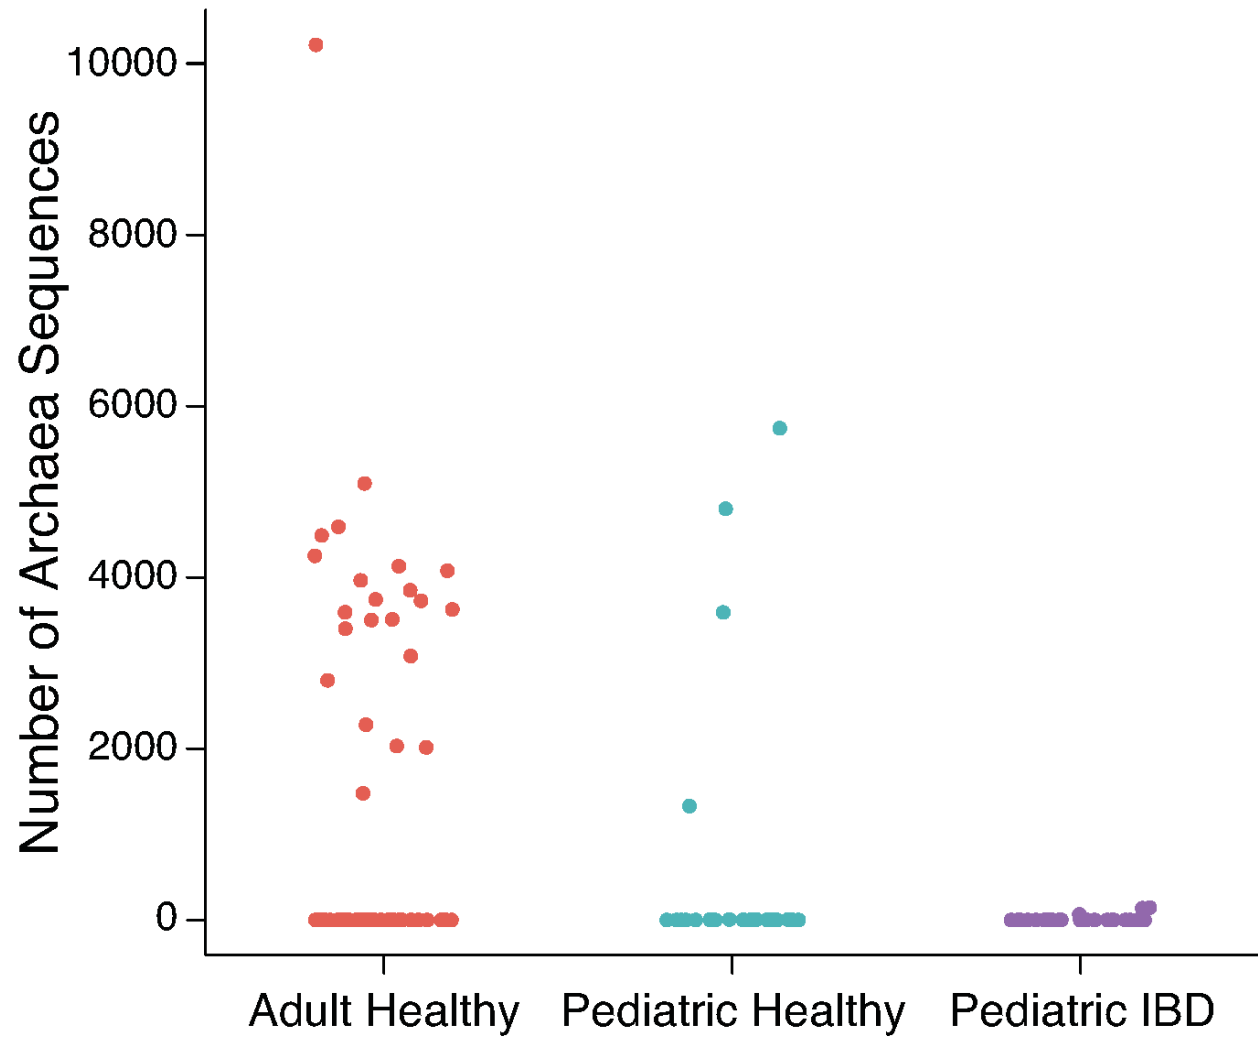

Supplement: ibd_2015_03_31_wu_15-0131_sdc8.pdf [file ibd_2015_03_31_wu_15-0131_sdc8.pdf]
