# Supplementary material for: Fungal Signature in the Gut Microbiota of Pediatric Patients With Inflammatory Bowel Disease
Source: Oxford University Press journal article supplement (doi:10.1097/mib.0000000000000454), 2015-06-17

Principal coordinate analysis is used to depict the relatedness of fungal communities based on abundance. The axes represent the first two highest discriminating axes using the abundance-weighted Jaccard index distance metric. Pediatric healthy subjects are depicted in cyan, and pediatric IBD subjects are depicted in lavender.

Supplemental Figure 6

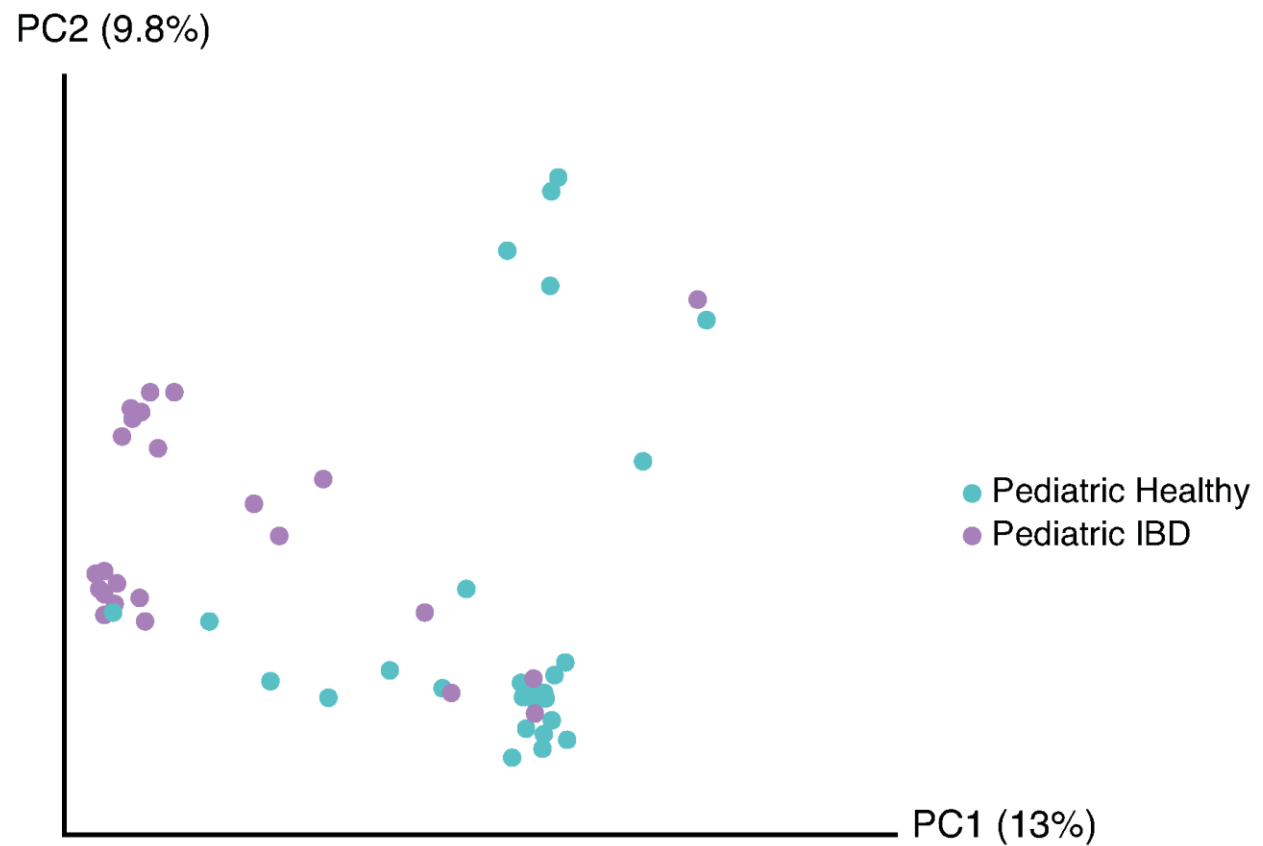

Supplement: ibd_2015_03_31_wu_15-0131_sdc9.pdf [file ibd_2015_03_31_wu_15-0131_sdc9.pdf]
