# Supplementary material for: Fungal Signature in the Gut Microbiota of Pediatric Patients With Inflammatory Bowel Disease
Source: Oxford University Press journal article supplement (doi:10.1097/mib.0000000000000454), 2015-06-17
Supplement: ibd_2015_03_31_wu_15-0131_sdc11.pdf [file ibd_2015_03_31_wu_15-0131_sdc11.pdf]

**Supplemental Table 3. Bacterial lineages used to sort IBD from healthy pediatric controls. Results from Random Forests classifier of 97% ID OTUs (species-level phylotypes) that discriminate the fecal microbiota according to health (healthy pediatrics v. IBD).**

| OTU-ID | Taxonomic assignment                                                                                         | Importance Score |                | Relative abundance of 97% ID OTU in each group (mean ± SD) |          |       |         |
|--------|--------------------------------------------------------------------------------------------------------------|------------------|----------------|------------------------------------------------------------|----------|-------|---------|
|        |                                                                                                              | Average          | Standard Error | Pediatric Healthy                                          |          | IBD   |         |
| 681    | p__Bacteroidetes; c__Bacteroidia; o__Bacteroidales; f__Bacteroidaceae; g__Bacteroides                        | 0.004464         | 0.001474       | 11.786                                                     | ± 11.696 | 0.063 | ± 0.246 |
| 213    | p__Bacteroidetes; c__Bacteroidia; o__Bacteroidales; f__Bacteroidaceae; g__Bacteroides                        | 0.003035         | 0.001149       | 61.143                                                     | ± 67.995 | 0.188 | ± 0.535 |
| 548    | p__Bacteroidetes; c__Bacteroidia; o__Bacteroidales; f__Bacteroidaceae; g__Bacteroides                        | 0.002674         | 0.001536       | 6.571                                                      | ± 9.549  | 0.000 | ± 0.000 |
| 714    | p__Bacteroidetes; c__Bacteroidia; o__Bacteroidales; f__Bacteroidaceae; g__Bacteroides                        | 0.002575         | 0.001012       | 4.214                                                      | ± 4.173  | 0.156 | ± 0.448 |
| 9      | p__Bacteroidetes; c__Bacteroidia; o__Bacteroidales; f__Bacteroidaceae; g__Bacteroides                        | 0.002233         | 0.001691       | 3.714                                                      | ± 3.872  | 0.031 | ± 0.177 |
| 649    | p__Bacteroidetes; c__Bacteroidia; o__Bacteroidales; f__Porphyromonadaceae; g__Parabacteroides                | 0.002184         | 0.001041       | 12.000                                                     | ± 22.668 | 0.000 | ± 0.000 |
| 1374   | p__Bacteroidetes; c__Bacteroidia; o__Bacteroidales; f__Porphyromonadaceae; g__Parabacteroides; s__distasonis | 0.002033         | 0.000991       | 5.500                                                      | ± 5.229  | 0.063 | ± 0.246 |
| 492    | p__Bacteroidetes; c__Bacteroidia; o__Bacteroidales; f__Rikenellaceae                                         | 0.001951         | 0.001021       | 3.714                                                      | ± 3.730  | 0.125 | ± 0.336 |
| 16716  | p__Bacteroidetes; c__Bacteroidia; o__Bacteroidales; f__Porphyromonadaceae; g__Parabacteroides; s__distasonis | 0.001932         | 0.000794       | 5.214                                                      | ± 5.087  | 0.063 | ± 0.354 |
| 18     | p__Firmicutes; c__Clostridia; o__Clostridiales; f__Lachnospiraceae; g__Coprococcus; s__eutactus              | 0.001900         | 0.000875       | 4.500                                                      | ± 6.619  | 0.031 | ± 0.177 |
| 865    | p__Bacteroidetes; c__Bacteroidia; o__Bacteroidales; f__Bacteroidaceae; g__Bacteroides                        | 0.001897         | 0.000912       | 3.000                                                      | ± 3.508  | 0.063 | ± 0.246 |
| 1843   | p__Firmicutes; c__Clostridia; o__Clostridiales; f__Ruminococcaceae; g__Faecalibacterium; s__prausnitzii      | 0.001808         | 0.001139       | 2.786                                                      | ± 4.098  | 0.000 | ± 0.000 |
| 778    | p__Firmicutes; c__Clostridia; o__Clostridiales; f__Lachnospiraceae; g__Roseburia                             | 0.001807         | 0.001123       | 8.571                                                      | ± 13.608 | 0.125 | ± 0.421 |
| 1900   | p__Bacteroidetes; c__Bacteroidia; o__Bacteroidales; f__Rikenellaceae                                         | 0.001632         | 0.000995       | 3.857                                                      | ± 4.016  | 0.000 | ± 0.000 |
| 765    | p__Bacteroidetes; c__Bacteroidia; o__Bacteroidales; f__Rikenellaceae                                         | 0.001569         | 0.000940       | 3.000                                                      | ± 2.828  | 0.125 | ± 0.554 |
| 1991   | p__Bacteroidetes; c__Bacteroidia; o__Bacteroidales; f__Porphyromonadaceae; g__Parabacteroides                | 0.001466         | 0.001165       | 5.000                                                      | ± 9.519  | 0.000 | ± 0.000 |

|       |                                                                                                                 |          |          |        |   |        |       |   |       |
|-------|-----------------------------------------------------------------------------------------------------------------|----------|----------|--------|---|--------|-------|---|-------|
| 456   | p__Bacteroidetes; c__Bacteroidia; o__Bacteroidales;<br>f__Bacteroidaceae; g__Bacteroides                        | 0.001463 | 0.000862 | 1.286  | ± | 1.437  | 0.000 | ± | 0.000 |
| 508   | p__Firmicutes; c__Clostridia; o__Clostridiales; f__Lachnospiraceae;<br>g__Roseburia                             | 0.001440 | 0.000481 | 15.214 | ± | 18.031 | 0.344 | ± | 0.827 |
| 3485  | p__Bacteroidetes; c__Bacteroidia; o__Bacteroidales; f__Rikenellaceae                                            | 0.001388 | 0.000777 | 24.000 | ± | 21.289 | 1.031 | ± | 2.117 |
| 454   | p__Bacteroidetes; c__Bacteroidia; o__Bacteroidales; f__Rikenellaceae                                            | 0.001353 | 0.000751 | 4.357  | ± | 6.990  | 0.000 | ± | 0.000 |
| 514   | p__Bacteroidetes; c__Bacteroidia; o__Bacteroidales;<br>f__Porphyromonadaceae; g__Parabacteroides                | 0.001340 | 0.001076 | 11.000 | ± | 15.522 | 0.094 | ± | 0.390 |
| 1281  | p__Bacteroidetes; c__Bacteroidia; o__Bacteroidales;<br>f__Bacteroidaceae; g__Bacteroides                        | 0.001309 | 0.000785 | 2.429  | ± | 2.593  | 0.156 | ± | 0.448 |
| 1455  | p__Bacteroidetes; c__Bacteroidia; o__Bacteroidales; f__Rikenellaceae                                            | 0.001268 | 0.000952 | 1.143  | ± | 1.292  | 0.000 | ± | 0.000 |
| 11710 | p__Bacteroidetes; c__Bacteroidia; o__Bacteroidales;<br>f__Bacteroidaceae; g__Bacteroides                        | 0.001221 | 0.000674 | 1.429  | ± | 1.505  | 0.031 | ± | 0.177 |
| 2404  | p__Bacteroidetes; c__Bacteroidia; o__Bacteroidales;<br>f__Bacteroidaceae; g__Bacteroides                        | 0.001204 | 0.000497 | 2.857  | ± | 4.055  | 0.000 | ± | 0.000 |
| 2119  | p__Bacteroidetes; c__Bacteroidia; o__Bacteroidales;<br>f__Bacteroidaceae; g__Bacteroides                        | 0.001171 | 0.001011 | 2.143  | ± | 2.538  | 0.000 | ± | 0.000 |
| 21101 | p__Bacteroidetes; c__Bacteroidia; o__Bacteroidales; f__Rikenellaceae                                            | 0.001163 | 0.000796 | 0.714  | ± | 0.825  | 0.000 | ± | 0.000 |
| 17912 | p__Bacteroidetes; c__Bacteroidia; o__Bacteroidales;<br>f__[Odoribacteraceae]; g__Odoribacter                    | 0.001151 | 0.000875 | 3.000  | ± | 3.508  | 0.000 | ± | 0.000 |
| 1021  | p__Bacteroidetes; c__Bacteroidia; o__Bacteroidales;<br>f__Porphyromonadaceae; g__Parabacteroides; s__distasonis | 0.001150 | 0.000726 | 1.643  | ± | 1.823  | 0.000 | ± | 0.000 |
| 332   | p__Bacteroidetes; c__Bacteroidia; o__Bacteroidales; f__Rikenellaceae                                            | 0.001112 | 0.000702 | 3.500  | ± | 3.322  | 0.188 | ± | 0.644 |
| 168   | p__Bacteroidetes; c__Bacteroidia; o__Bacteroidales;<br>f__Bacteroidaceae; g__Bacteroides                        | 0.001096 | 0.001114 | 2.643  | ± | 2.818  | 0.063 | ± | 0.246 |
| 20573 | p__Bacteroidetes; c__Bacteroidia; o__Bacteroidales; f__Rikenellaceae                                            | 0.001059 | 0.000871 | 3.071  | ± | 3.075  | 0.281 | ± | 0.634 |
| 601   | p__Firmicutes; c__Clostridia; o__Clostridiales; f__Lachnospiraceae                                              | 0.001050 | 0.000765 | 1.429  | ± | 1.651  | 0.000 | ± | 0.000 |
