# Supplementary material for: Fungal Signature in the Gut Microbiota of Pediatric Patients With Inflammatory Bowel Disease
Source: Oxford University Press journal article supplement (doi:10.1097/mib.0000000000000454), 2015-06-17
Supplement: ibd_2015_03_31_wu_15-0131_sdc12.pdf [file ibd_2015_03_31_wu_15-0131_sdc12.pdf]

**Supplemental Table 4. Bacterial lineages used to sort IBD from healthy controls (pooled pediatric and adult). Results from Random Forests classifier of 97% bacterial OTUs (species-level phylotypes) that discriminate the fecal microbiota according to health (healthy adults and healthy pediatrics v. IBD).**

| OTU-ID | Taxonomic assignment                                                                                         | Importance Score |                | Relative abundance of 97% ID OTU in each group (mean ± SD) |               |
|--------|--------------------------------------------------------------------------------------------------------------|------------------|----------------|------------------------------------------------------------|---------------|
|        |                                                                                                              | Average          | Standard Error | Healthy                                                    | IBD           |
| 28387  | p__Firmicutes; c__Clostridia; o__Clostridiales; f__Peptostreptococcaceae                                     | 0.001044         | 0.000693       | 0.125 ± 0.519                                              | 3.156 ± 8.101 |
| 213    | p__Bacteroidetes; c__Bacteroidia; o__Bacteroidales; f__Bacteroidaceae; g__Bacteroides                        | 0.005851         | 0.001082       | 40.078 ± 56.221                                            | 0.188 ± 0.535 |
| 681    | p__Bacteroidetes; c__Bacteroidia; o__Bacteroidales; f__Bacteroidaceae; g__Bacteroides                        | 0.005512         | 0.001542       | 8.531 ± 11.222                                             | 0.063 ± 0.246 |
| 548    | p__Bacteroidetes; c__Bacteroidia; o__Bacteroidales; f__Bacteroidaceae; g__Bacteroides                        | 0.004246         | 0.001644       | 4.578 ± 6.034                                              | 0.000 ± 0.000 |
| 508    | p__Firmicutes; c__Clostridia; o__Clostridiales; f__Lachnospiraceae; g__Roseburia                             | 0.003942         | 0.001240       | 15.609 ± 18.041                                            | 0.344 ± 0.827 |
| 778    | p__Firmicutes; c__Clostridia; o__Clostridiales; f__Lachnospiraceae; g__Roseburia                             | 0.003832         | 0.001153       | 8.516 ± 12.638                                             | 0.125 ± 0.421 |
| 1021   | p__Bacteroidetes; c__Bacteroidia; o__Bacteroidales; f__Porphyromonadaceae; g__Parabacteroides; s__distasonis | 0.003256         | 0.001524       | 2.359 ± 3.083                                              | 0.000 ± 0.000 |
| 2426   | p__Firmicutes; c__Clostridia; o__Clostridiales; f__Lachnospiraceae                                           | 0.003119         | 0.000728       | 5.172 ± 7.313                                              | 0.094 ± 0.390 |
| 601    | p__Firmicutes; c__Clostridia; o__Clostridiales; f__Lachnospiraceae                                           | 0.002847         | 0.000961       | 2.953 ± 6.661                                              | 0.000 ± 0.000 |
| 18     | p__Firmicutes; c__Clostridia; o__Clostridiales; f__Lachnospiraceae; g__Coprococcus; s__eutactus              | 0.002760         | 0.000930       | 8.469 ± 20.604                                             | 0.031 ± 0.177 |
| 16716  | p__Bacteroidetes; c__Bacteroidia; o__Bacteroidales; f__Porphyromonadaceae; g__Parabacteroides; s__distasonis | 0.002568         | 0.001305       | 4.344 ± 5.680                                              | 0.063 ± 0.354 |
| 10542  | p__Firmicutes; c__Clostridia; o__Clostridiales; f__Lachnospiraceae; g__Blautia                               | 0.002491         | 0.001303       | 3.281 ± 3.794                                              | 0.594 ± 1.434 |
| 236    | p__Bacteroidetes; c__Bacteroidia; o__Bacteroidales; f__Bacteroidaceae; g__Bacteroides                        | 0.002386         | 0.000928       | 16.156 ± 20.266                                            | 0.813 ± 2.546 |
| 1144   | p__Firmicutes; c__Clostridia; o__Clostridiales; f__Lachnospiraceae                                           | 0.002285         | 0.000766       | 4.969 ± 6.466                                              | 0.094 ± 0.296 |
| 1374   | p__Bacteroidetes; c__Bacteroidia; o__Bacteroidales; f__Porphyromonadaceae; g__Parabacteroides; s__distasonis | 0.002272         | 0.000494       | 4.828 ± 6.199                                              | 0.063 ± 0.246 |
| 1652   | p__Firmicutes; c__Clostridia; o__Clostridiales; f__Lachnospiraceae; g__Lachnospira                           | 0.002193         | 0.000866       | 1.406 ± 2.121                                              | 0.000 ± 0.000 |
| 280    | p__Firmicutes; c__Clostridia; o__Clostridiales; f__Lachnospiraceae; g__Lachnospira                           | 0.002067         | 0.000838       | 2.766 ± 4.356                                              | 0.031 ± 0.177 |
| 1843   | p__Firmicutes; c__Clostridia; o__Clostridiales; f__Ruminococcaceae; g__Faecalibacterium; s__prausnitzii      | 0.002061         | 0.001113       | 3.047 ± 4.878                                              | 0.000 ± 0.000 |

|       |                                                                                                            |          |          |                 |               |
|-------|------------------------------------------------------------------------------------------------------------|----------|----------|-----------------|---------------|
| 649   | p__Bacteroidetes; c__Bacteroidia; o__Bacteroidales;<br>f__Porphyromonadaceae; g__Parabacteroides           | 0.002006 | 0.000570 | 7.797 ± 13.143  | 0.000 ± 0.000 |
| 3485  | p__Bacteroidetes; c__Bacteroidia; o__Bacteroidales; f__Rikenellaceae                                       | 0.001944 | 0.000765 | 20.859 ± 29.770 | 1.031 ± 2.117 |
| 865   | p__Bacteroidetes; c__Bacteroidia; o__Bacteroidales; f__Bacteroidaceae;<br>g__Bacteroides                   | 0.001925 | 0.000531 | 2.172 ± 2.640   | 0.063 ± 0.246 |
| 2934  | p__Firmicutes; c__Clostridia; o__Clostridiales; f__Lachnospiraceae                                         | 0.001871 | 0.000578 | 3.844 ± 4.748   | 0.219 ± 0.659 |
| 492   | p__Bacteroidetes; c__Bacteroidia; o__Bacteroidales; f__Rikenellaceae                                       | 0.001834 | 0.000586 | 4.422 ± 5.354   | 0.125 ± 0.336 |
| 1900  | p__Bacteroidetes; c__Bacteroidia; o__Bacteroidales; f__Rikenellaceae                                       | 0.001794 | 0.000953 | 2.750 ± 4.239   | 0.000 ± 0.000 |
| 514   | p__Bacteroidetes; c__Bacteroidia; o__Bacteroidales;<br>f__Porphyromonadaceae; g__Parabacteroides           | 0.001754 | 0.000494 | 7.953 ± 11.070  | 0.094 ± 0.390 |
| 1833  | p__Bacteroidetes; c__Bacteroidia; o__Bacteroidales; f__Rikenellaceae                                       | 0.001611 | 0.000485 | 1.656 ± 2.169   | 0.000 ± 0.000 |
| 17912 | p__Bacteroidetes; c__Bacteroidia; o__Bacteroidales;<br>f__[Odoribacteraceae]; g__Odoribacter               | 0.001574 | 0.000369 | 2.813 ± 3.389   | 0.000 ± 0.000 |
| 866   | p__Bacteroidetes; c__Bacteroidia; o__Bacteroidales; f__Bacteroidaceae;<br>g__Bacteroides; s__uniformis     | 0.001573 | 0.000668 | 13.031 ± 23.126 | 0.438 ± 0.840 |
| 5467  | p__Firmicutes; c__Clostridia; o__Clostridiales; f__Ruminococcaceae;<br>g__Faecalibacterium; s__prausnitzii | 0.001539 | 0.000805 | 7.578 ± 11.499  | 0.469 ± 0.950 |
| 2404  | p__Bacteroidetes; c__Bacteroidia; o__Bacteroidales; f__Bacteroidaceae;<br>g__Bacteroides                   | 0.001538 | 0.000557 | 1.469 ± 2.417   | 0.000 ± 0.000 |
| 2003  | p__Firmicutes; c__Clostridia; o__Clostridiales; f__Lachnospiraceae                                         | 0.001478 | 0.001008 | 2.922 ± 3.248   | 0.125 ± 0.421 |
| 4387  | p__Bacteroidetes; c__Bacteroidia; o__Bacteroidales; f__Bacteroidaceae;<br>g__Bacteroides; s__uniformis     | 0.001473 | 0.000682 | 4.859 ± 8.207   | 0.000 ± 0.000 |
| 1991  | p__Bacteroidetes; c__Bacteroidia; o__Bacteroidales;<br>f__Porphyromonadaceae; g__Parabacteroides           | 0.001458 | 0.000676 | 3.531 ± 6.404   | 0.000 ± 0.000 |
| 1123  | p__Firmicutes; c__Clostridia; o__Clostridiales; f__Lachnospiraceae;<br>g__Ruminococcus; s__gnavus          | 0.001456 | 0.001046 | 14.172 ± 25.142 | 2.281 ± 5.413 |
| 4799  | p__Firmicutes; c__Clostridia; o__Clostridiales; f__Lachnospiraceae;<br>g__Roseburia                        | 0.001419 | 0.000622 | 1.500 ± 2.175   | 0.000 ± 0.000 |
| 858   | p__Bacteroidetes; c__Bacteroidia; o__Bacteroidales; f__Bacteroidaceae;<br>g__Bacteroides                   | 0.001382 | 0.000701 | 1.188 ± 1.943   | 0.000 ± 0.000 |
| 765   | p__Bacteroidetes; c__Bacteroidia; o__Bacteroidales; f__Rikenellaceae                                       | 0.001375 | 0.000581 | 3.313 ± 4.279   | 0.125 ± 0.554 |
| 8632  | p__Firmicutes; c__Clostridia; o__Clostridiales; f__Lachnospiraceae                                         | 0.001240 | 0.000789 | 1.719 ± 3.150   | 0.094 ± 0.530 |
| 304   | p__Bacteroidetes; c__Bacteroidia; o__Bacteroidales; f__Bacteroidaceae;<br>g__Bacteroides                   | 0.001229 | 0.000756 | 3.078 ± 5.168   | 0.188 ± 0.644 |
| 1535  | p__Bacteroidetes; c__Bacteroidia; o__Bacteroidales; f__Bacteroidaceae;<br>g__Bacteroides; s__uniformis     | 0.001223 | 0.000720 | 5.766 ± 9.343   | 0.125 ± 0.421 |
| 6958  | p__Firmicutes; c__Clostridia; o__Clostridiales; f__Lachnospiraceae;<br>g__Roseburia                        | 0.001176 | 0.000554 | 0.750 ± 1.024   | 0.000 ± 0.000 |

|      |                                                                                                                 |          |          |                 |                 |
|------|-----------------------------------------------------------------------------------------------------------------|----------|----------|-----------------|-----------------|
| 714  | p__Bacteroidetes; c__Bacteroidia; o__Bacteroidales; f__Bacteroidaceae;<br>g__Bacteroides                        | 0.001129 | 0.000577 | 2.438 ± 3.075   | 0.156 ± 0.448   |
| 1455 | p__Bacteroidetes; c__Bacteroidia; o__Bacteroidales; f__Rikenellaceae                                            | 0.001114 | 0.000505 | 1.016 ± 1.496   | 0.000 ± 0.000   |
| 1100 | p__Firmicutes; c__Clostridia; o__Clostridiales; f__Lachnospiraceae;<br>g__Coprococcus                           | 0.001109 | 0.000695 | 0.969 ± 1.877   | 0.000 ± 0.000   |
| 146  | p__Firmicutes; c__Clostridia; o__Clostridiales; f__Lachnospiraceae;<br>g__Roseburia                             | 0.001097 | 0.000576 | 84.453 ± 92.216 | 13.906 ± 18.671 |
| 1262 | p__Bacteroidetes; c__Bacteroidia; o__Bacteroidales; f__Bacteroidaceae;<br>g__Bacteroides                        | 0.001096 | 0.000588 | 1.547 ± 2.160   | 0.094 ± 0.390   |
| 4057 | p__Bacteroidetes; c__Bacteroidia; o__Bacteroidales;<br>f__Porphyromonadaceae; g__Parabacteroides; s__distasonis | 0.001037 | 0.000558 | 0.875 ± 1.496   | 0.031 ± 0.177   |
| 3278 | p__Bacteroidetes; c__Bacteroidia; o__Bacteroidales;<br>f__Porphyromonadaceae; g__Parabacteroides; s__distasonis | 0.001036 | 0.000415 | 0.672 ± 1.113   | 0.000 ± 0.000   |
