# Supplementary material for: Fungal Signature in the Gut Microbiota of Pediatric Patients With Inflammatory Bowel Disease
Source: Oxford University Press journal article supplement (doi:10.1097/mib.0000000000000454), 2015-06-17
Supplement: ibd_2015_03_31_wu_15-0131_sdc13.pdf [file ibd_2015_03_31_wu_15-0131_sdc13.pdf]

**Supplemental Table 5. Fungal lineages used to sort IBD from healthy pediatric controls. Results from Random Forests classifier of 95.2% fungal OTUs that discriminate the fecal microbiota according to health.**

| OTU-ID                      | Taxonomic assignment                                                                                                               | Importance Score |                | Relative abundance of 95.2% ID OTU in each group (mean ± SD) |   |          |          |   |          |
|-----------------------------|------------------------------------------------------------------------------------------------------------------------------------|------------------|----------------|--------------------------------------------------------------|---|----------|----------|---|----------|
|                             |                                                                                                                                    | Average          | Standard Error | Pediatric Healthy                                            |   | IBD      |          |   |          |
| New.CleanUp.ReferenceOTU495 | k__Fungi; p__Ascomycota; c__Saccharomycetes; o__Saccharomycetales; f__Pichiaceae; g__Pichia; s__Pichia_jadinii                     | 0.034173         | 0.005123       | 0.207                                                        | ± | 0.675    | 14.645   | ± | 19.766   |
| GU370744                    | k__Fungi; p__Ascomycota; c__Saccharomycetes; o__Saccharomycetales; f__Pichiaceae; g__Pichia; s__Pichia_jadinii                     | 0.029635         | 0.006735       | 357.241                                                      | ± | 1474.647 | 1818.968 | ± | 1940.458 |
| New.ReferenceOTU1           | k__Fungi; p__Ascomycota; c__Saccharomycetes; o__Saccharomycetales; f__Pichiaceae; g__Pichia; s__Pichia_jadinii                     | 0.025741         | 0.003993       | 0.724                                                        | ± | 3.184    | 15.258   | ± | 19.122   |
| New.CleanUp.ReferenceOTU283 | k__Fungi; p__Ascomycota; c__Saccharomycetes; o__Saccharomycetales; f__Pichiaceae; g__Pichia; s__Pichia_jadinii                     | 0.013555         | 0.002308       | 0.000                                                        | ± | 0.000    | 1.129    | ± | 1.500    |
| New.CleanUp.ReferenceOTU194 | k__Fungi; p__Ascomycota; c__Saccharomycetes; o__Saccharomycetales; f__Pichiaceae; g__Pichia; s__Pichia_jadinii                     | 0.012790         | 0.002929       | 0.000                                                        | ± | 0.000    | 1.419    | ± | 2.405    |
| EU288196                    | k__Fungi; p__Ascomycota; c__Saccharomycetes; o__Saccharomycetales; f__Incertae_sedis; g__Candida; s__Candida_tropicalis            | 0.007907         | 0.003095       | 34.000                                                       | ± | 116.998  | 185.258  | ± | 257.346  |
| AB369915                    | k__Fungi; p__Ascomycota; c__Saccharomycetes; o__Saccharomycetales; f__Incertae_sedis; g__Candida; s__Candida_sp.                   | 0.007002         | 0.003556       | 369.724                                                      | ± | 1364.184 | 545.806  | ± | 1511.539 |
| New.CleanUp.ReferenceOTU120 | k__Fungi; p__Ascomycota; c__Saccharomycetes; o__Saccharomycetales; f__Saccharomycetaceae; g__Debaryomyces; s__Debaryomyces_sp_R344 | 0.005081         | 0.002089       | 0.000                                                        | ± | 0.000    | 0.129    | ± | 0.341    |
| New.CleanUp.ReferenceOTU209 | k__Fungi; p__Ascomycota; c__Saccharomycetes; o__Saccharomycetales; f__Pichiaceae; g__Pichia; s__Pichia_jadinii                     | 0.004332         | 0.002355       | 0.034                                                        | ± | 0.186    | 1.323    | ± | 2.856    |
| GQ458025                    | k__Fungi; p__Ascomycota; c__Saccharomycetes; o__Saccharomycetales; f__Saccharomycetaceae; g__Debaryomyces                          | 0.003748         | 0.002361       | 26.414                                                       | ± | 81.403   | 127.581  | ± | 324.125  |
| FJ430772                    | k__Fungi; p__Ascomycota; c__Eurotiomycetes; o__Eurotiales;                                                                         | 0.002603         | 0.001504       | 0.000                                                        | ± | 0.000    | 3.484    | ± | 10.132   |

|                                 |                                                                                                                                                                                    |          |          |        |   |         |        |   |         |
|---------------------------------|------------------------------------------------------------------------------------------------------------------------------------------------------------------------------------|----------|----------|--------|---|---------|--------|---|---------|
| New.CleanUp.Re<br>ferenceOTU378 | f__Trichocomaceae; g__Penicillium; s__Penicillium_citrinum<br>k__Fungi; p__Ascomycota; c__Saccharomycetes;<br>o__Saccharomycetales; f__Pichiaceae; g__Pichia;<br>s__Pichia_jadinii | 0.002247 | 0.000947 | 0.000  | ± | 0.000   | 0.355  | ± | 0.798   |
| New.CleanUp.Re<br>ferenceOTU372 | k__Fungi; p__Ascomycota; c__Saccharomycetes;<br>o__Saccharomycetales; f__Pichiaceae; g__Pichia;<br>s__Pichia_jadinii                                                               | 0.001503 | 0.000769 | 0.000  | ± | 0.000   | 0.355  | ± | 0.709   |
| JN905688                        | k__Fungi; p__Basidiomycota; c__Tremellomycetes;<br>o__Cystofilobasidiales; f__unidentified; g__unidentified;<br>s__unculturedGuehomyces                                            | 0.001427 | 0.000977 | 6.966  | ± | 37.510  | 23.258 | ± | 80.593  |
| New.CleanUp.Re<br>ferenceOTU93  | k__Fungi; p__Ascomycota; c__Saccharomycetes;<br>o__Saccharomycetales; f__Pichiaceae; g__Pichia;<br>s__Pichia_jadinii                                                               | 0.001414 | 0.001141 | 0.069  | ± | 0.258   | 1.194  | ± | 3.038   |
| AM901904                        | k__Fungi; p__Ascomycota; c__Saccharomycetes;<br>o__Saccharomycetales; f__Incertae_sedis; g__Candida                                                                                | 0.001285 | 0.002208 | 43.862 | ± | 151.129 | 73.194 | ± | 213.854 |
| New.CleanUp.Re<br>ferenceOTU398 | k__Fungi; p__Ascomycota; c__Saccharomycetes;<br>o__Saccharomycetales; f__Pichiaceae; g__Pichia;<br>s__Pichia_jadinii                                                               | 0.001199 | 0.000796 | 0.000  | ± | 0.000   | 0.258  | ± | 0.514   |
| DQ683113                        | k__Fungi; p__Ascomycota; c__Saccharomycetes;<br>o__Saccharomycetales; f__Saccharomycetaceae;<br>g__Debaryomyces                                                                    | 0.001387 | 0.001108 | 0.207  | ± | 0.940   | 0.935  | ± | 2.707   |
| FN428887                        | k__Fungi; p__Ascomycota; c__Saccharomycetes;<br>o__Saccharomycetales                                                                                                               | 0.006926 | 0.002473 | 84.690 | ± | 205.660 | 0.774  | ± | 4.311   |
| AM901773                        | k__Fungi; p__Ascomycota; c__Saccharomycetes;<br>o__Saccharomycetales                                                                                                               | 0.002747 | 0.001233 | 0.621  | ± | 1.821   | 0.000  | ± | 0.000   |
| DQ683018                        | k__Fungi; p__Ascomycota; c__Saccharomycetes;<br>o__Saccharomycetales                                                                                                               | 0.001481 | 0.001069 | 0.448  | ± | 1.378   | 0.000  | ± | 0.000   |
| EU490138                        | k__Fungi; p__Ascomycota; c__Dothideomycetes;<br>o__Capnodiales; f__Mycosphaerellaceae; g__Cladosporium;<br>s__Cladosporium_cladosporioides                                         | 0.001435 | 0.001143 | 15.241 | ± | 36.810  | 4.806  | ± | 8.912   |
| New.ReferenceO<br>TU2           | k__Fungi; p__Ascomycota; c__Eurotiomycetes; o__Eurotiales;<br>f__Trichocomaceae; g__Penicillium; s__Penicillium_roqueforti                                                         | 0.001265 | 0.001143 | 27.483 | ± | 79.488  | 0.935  | ± | 3.172   |
