# Supplementary material for: Fungal Signature in the Gut Microbiota of Pediatric Patients With Inflammatory Bowel Disease
Source: Oxford University Press journal article supplement (doi:10.1097/mib.0000000000000454), 2015-06-17

### Supplemental Figure 8: Correlations between Bacterial and Fungal OTUs in pediatric and healthy subjects

The Pearson correlation coefficient between fungal and bacterial OTUs in pediatric and adult subjects was calculated. OTUs were included in this heatmap if they had greater than 100 sequences in pediatric IBD patients. OTUs were included if they correlated with at least one other OTU (two-sided correlation whose p-value exceeded 0.05 after Bonferroni correction).

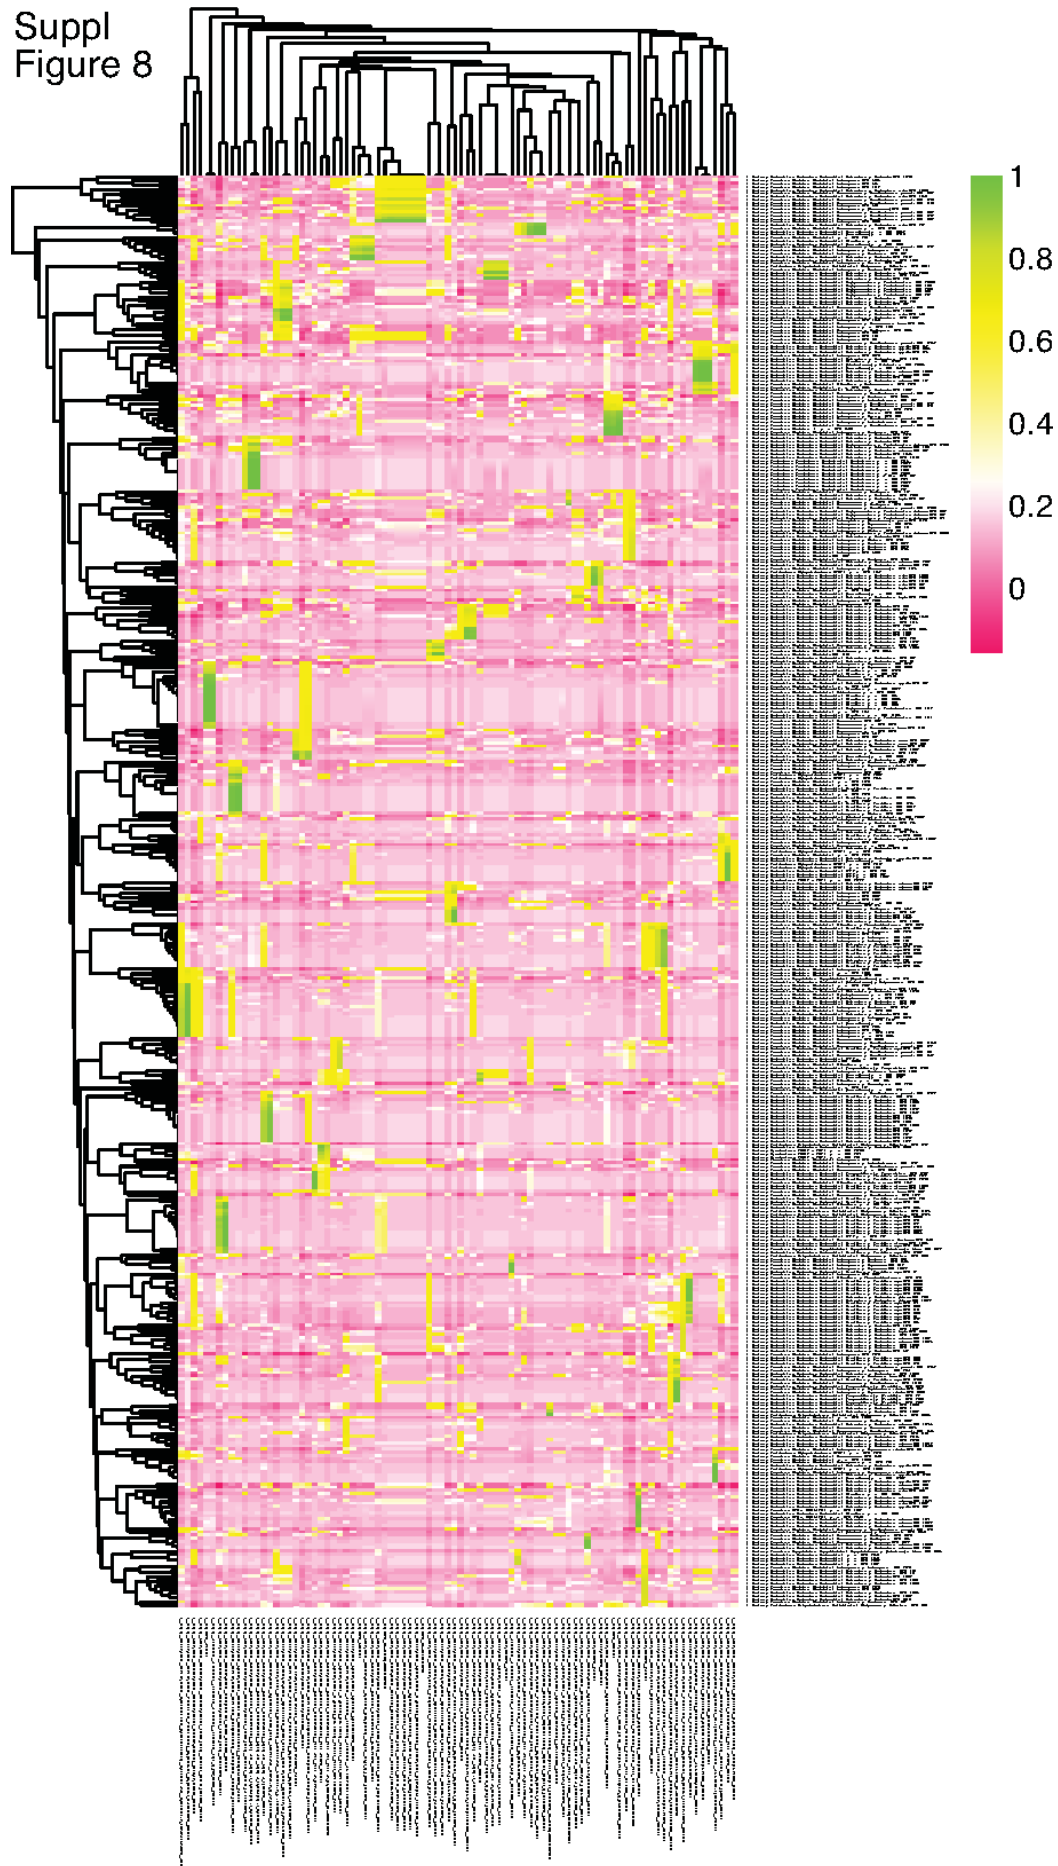

Supplement: ibd_2015_03_31_wu_15-0131_sdc15.pdf [file ibd_2015_03_31_wu_15-0131_sdc15.pdf]
